# Supplementary material for: The SMC Complex MukBEF Recruits Topoisomerase IV to the Origin of Replication Region in Live Escherichia coli
Source: PubMed Central journal article supplement (PMC3950513; doi:10.1128/mbio.01001-13), 2014-02-11
Supplement: mbo001141739sf04.pdf [file mbo001141739sf04.pdf]

**A**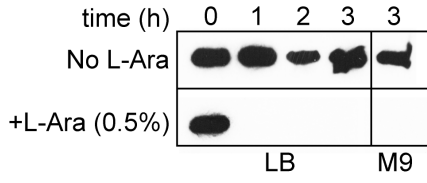**B**

+L-Arabinose (0.5%) + *dnaC(Ts)* (37°C)

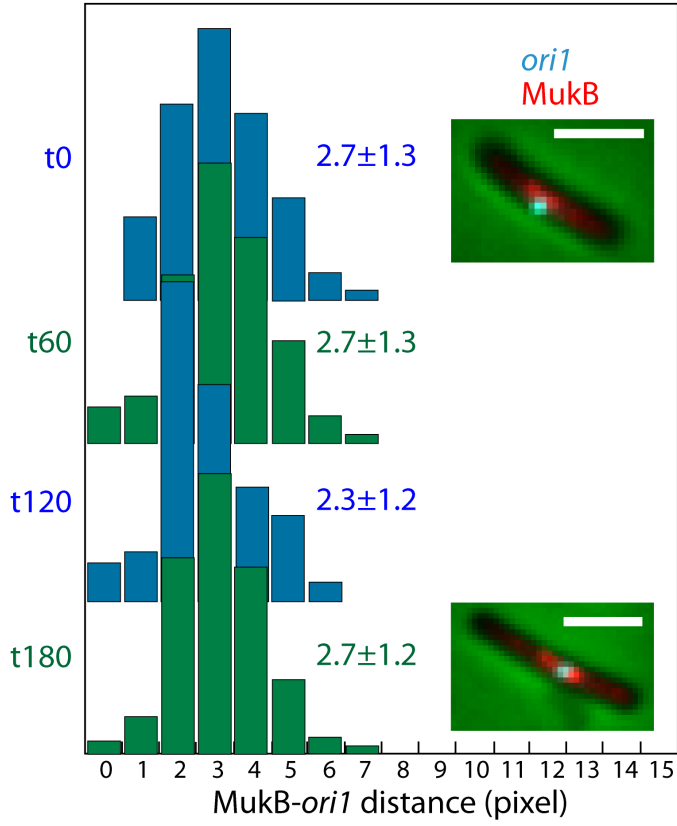**C**

ParE depletion/repletion

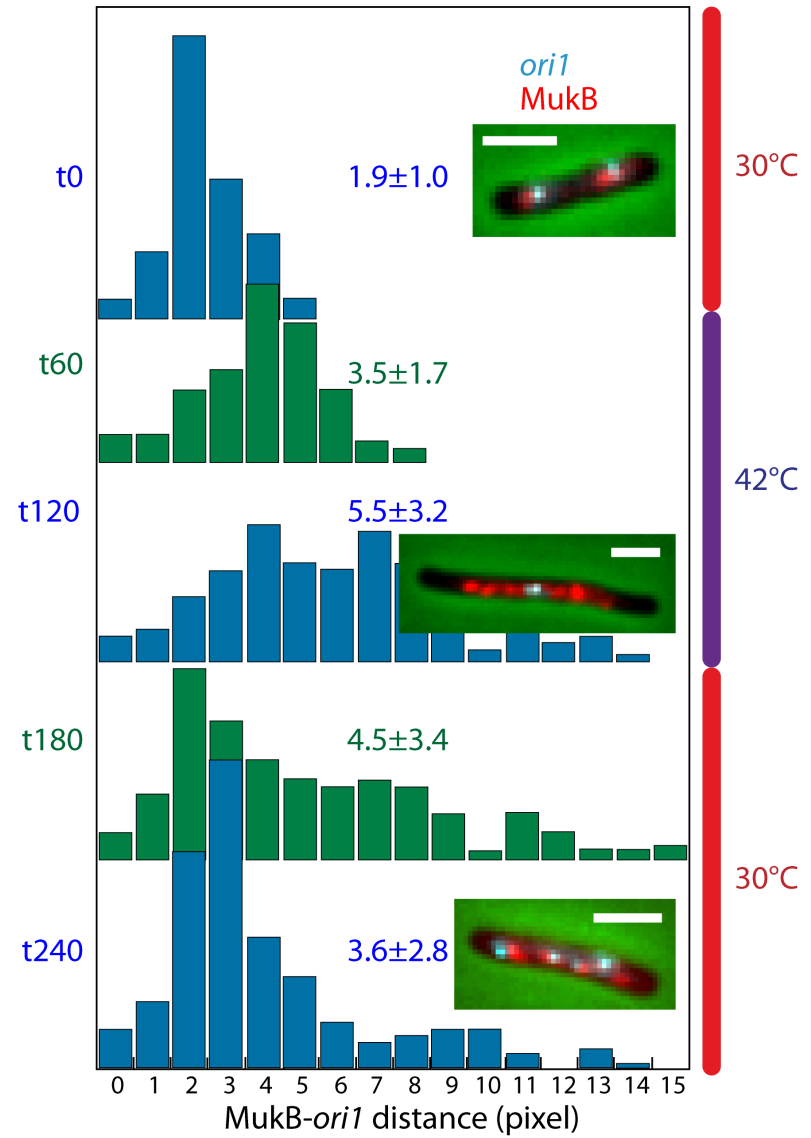

Fig. S4 Nicolas et al.
