# Supplementary material for: The SMC Complex MukBEF Recruits Topoisomerase IV to the Origin of Replication Region in Live Escherichia coli
Source: PubMed Central journal article supplement (PMC3950513; doi:10.1128/mbio.01001-13), 2014-02-11
Supplement: mbo001141739sf05.pdf [file mbo001141739sf05.pdf]

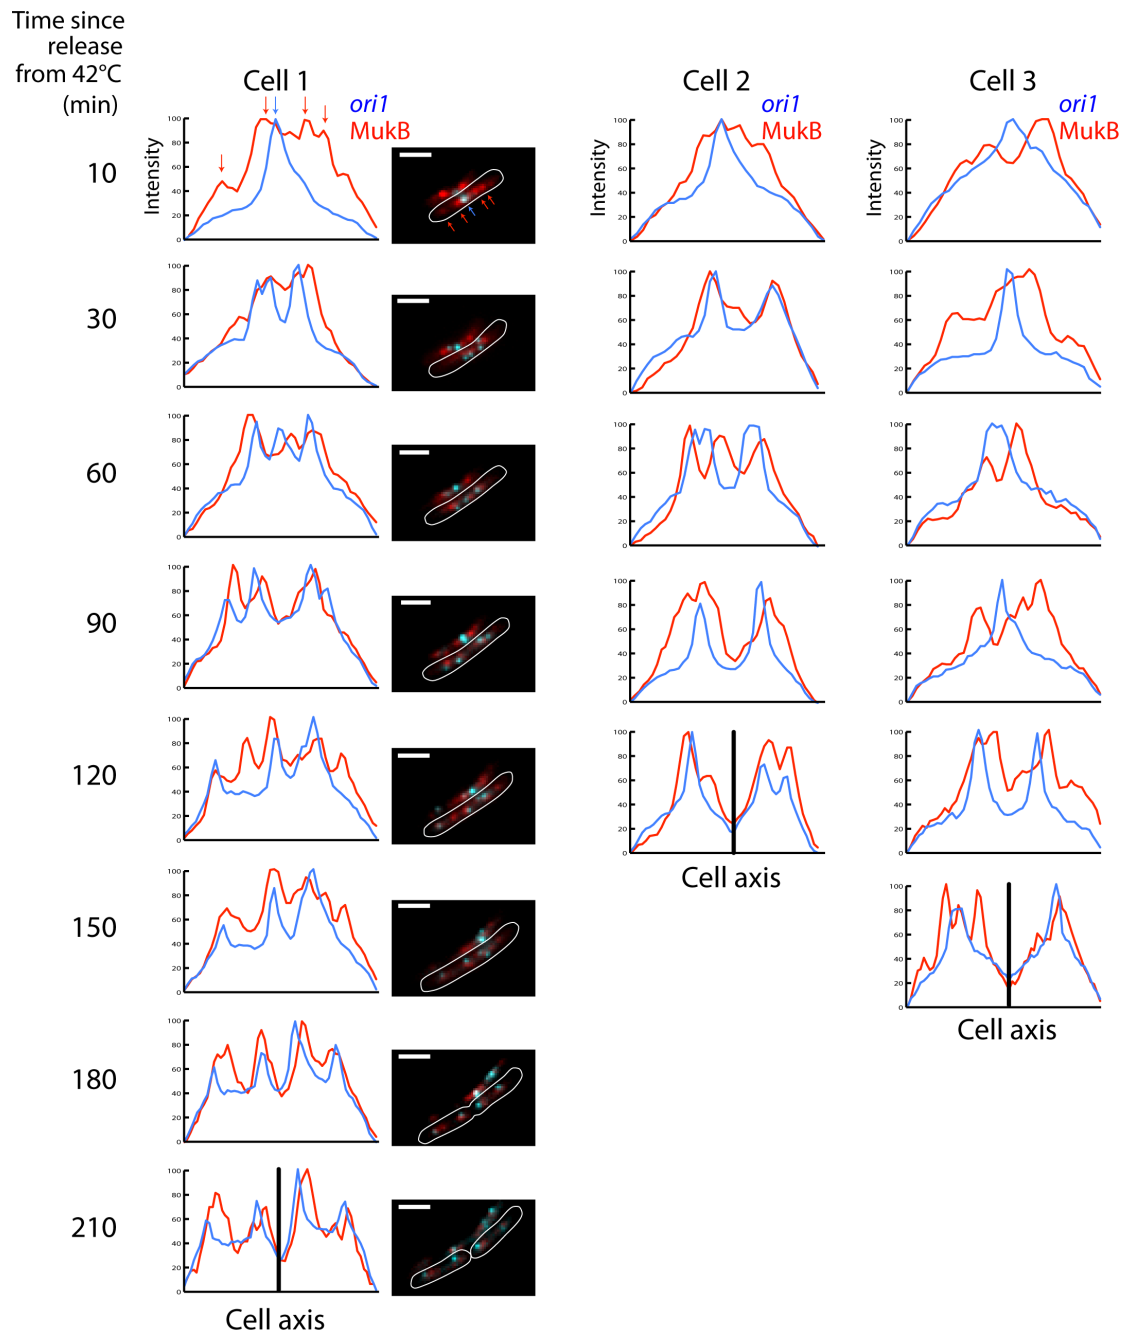

Fig. S5 Nicolas *et al.*
